# Supplementary material for: TLR3 activation enhances antitumor effects of sorafenib in hepatocellular carcinoma by activating NK cell functions through ERK and NF-κB pathways
Source: PubMed Central journal article supplement — Sci Rep. 2024 Nov 2;14:26422. doi: 10.1038/s41598-024-78316-3 (PMC11531577; doi:10.1038/s41598-024-78316-3), 2024-11-02

**ERK1/ERK2**

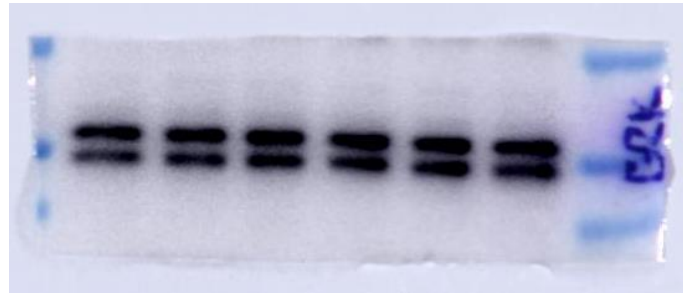

50kDa  
40kDa  
35kDa

**GAPDH**

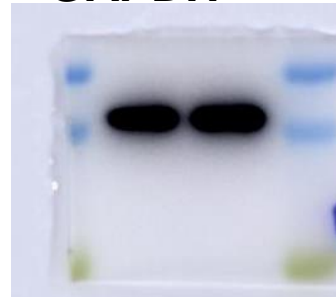

40kDa  
35kDa  
25kDa

**IKB**

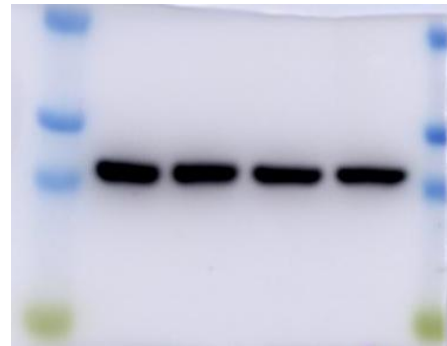

50kDa  
40kDa  
35kDa  
25kDa

**TLR3**

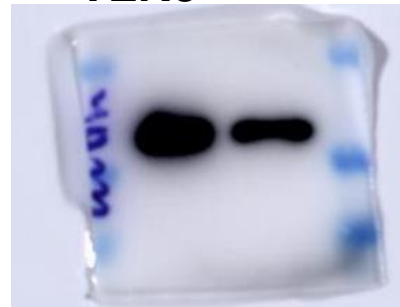

140kDa  
115kDa  
85kDa

Figure 6 A-1

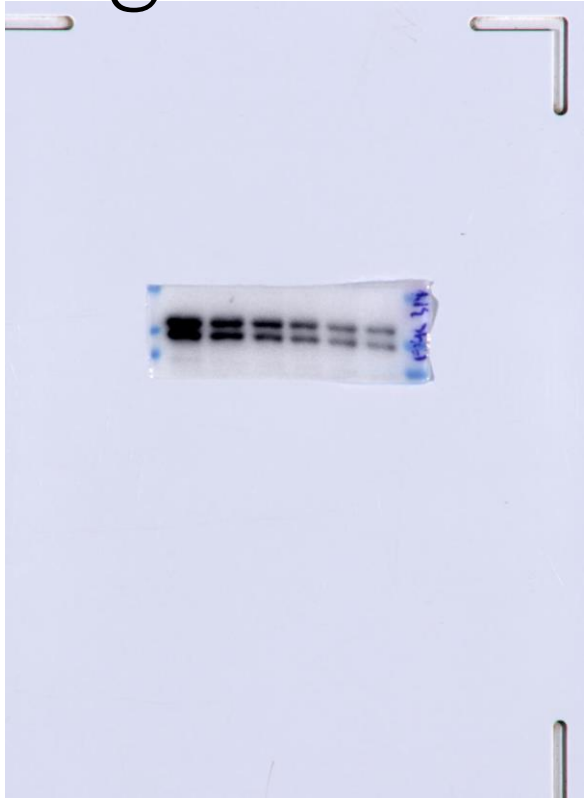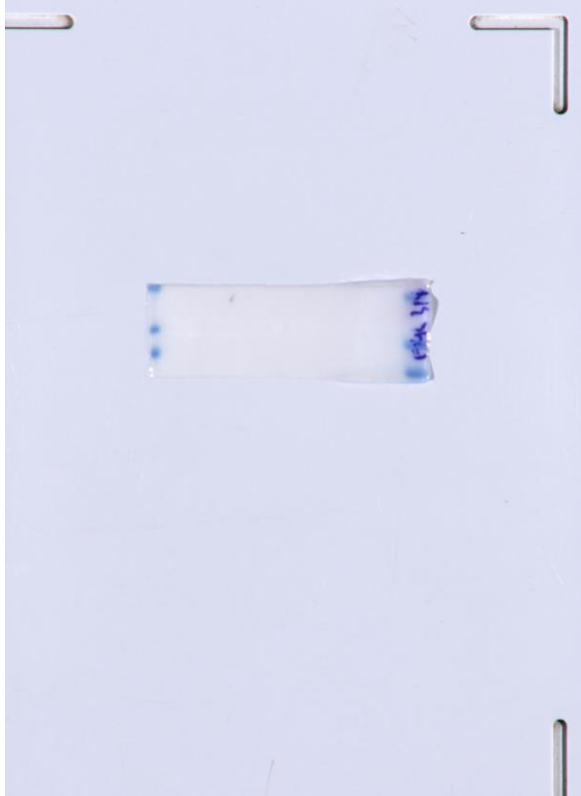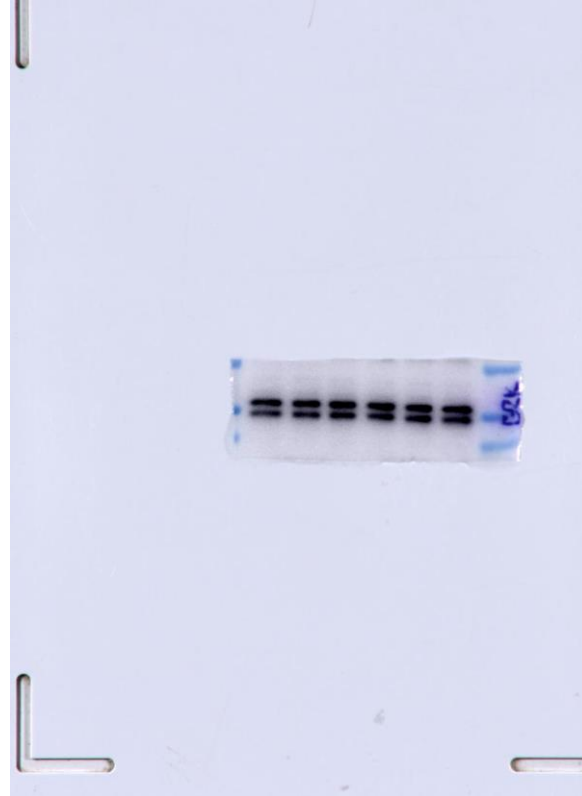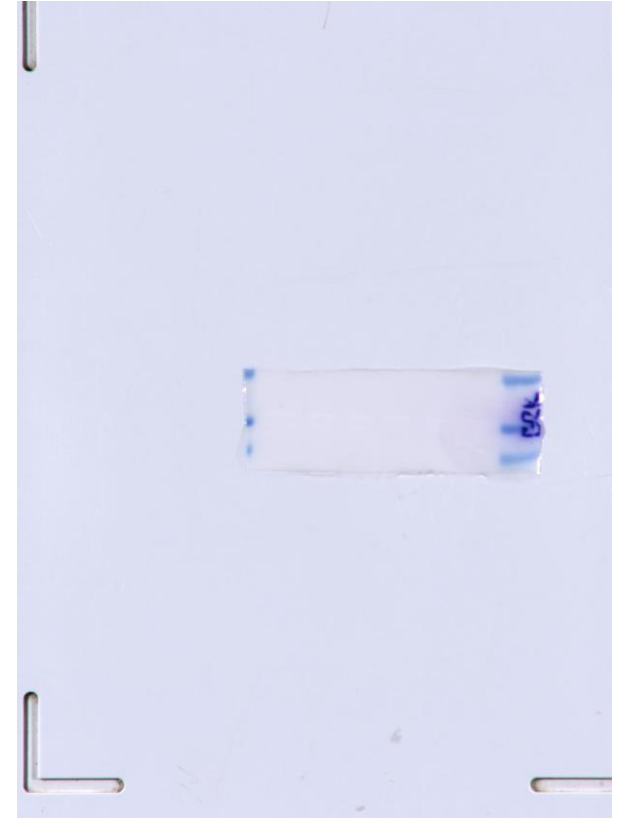

Figure 6 A-2

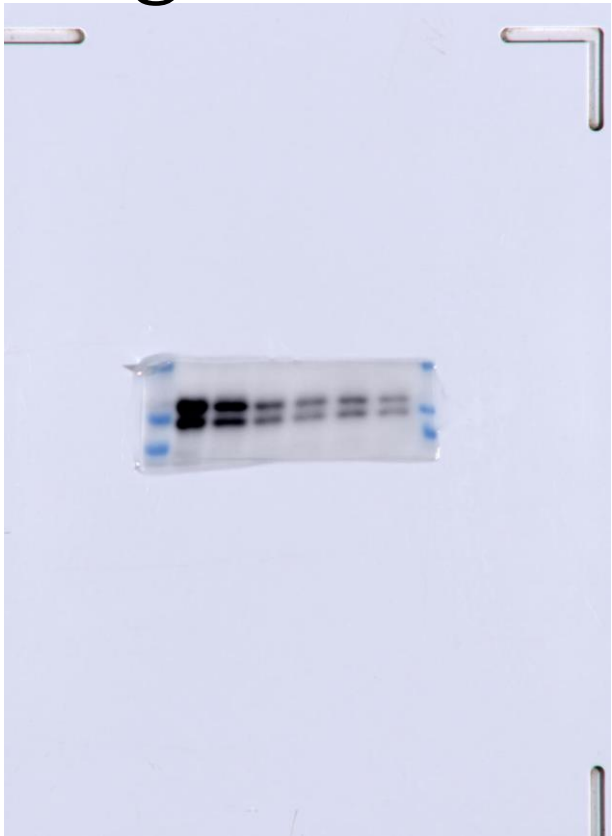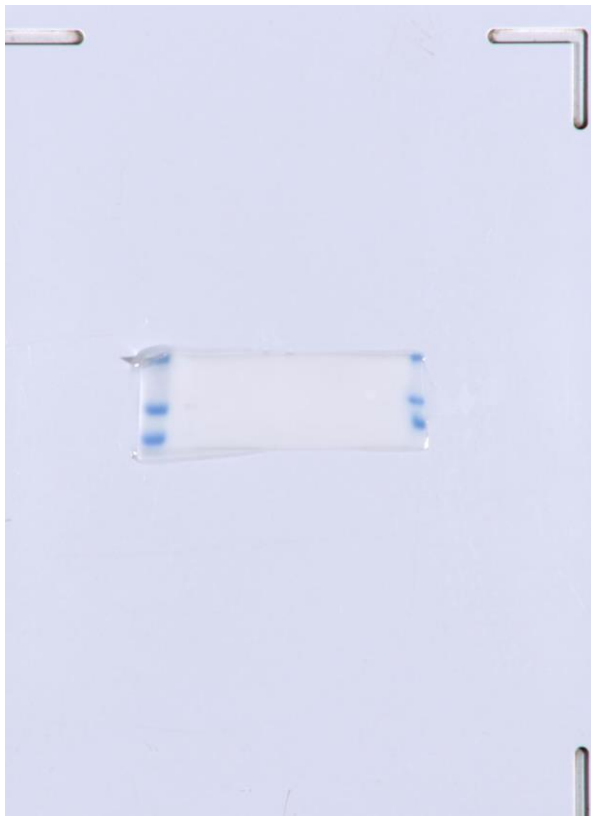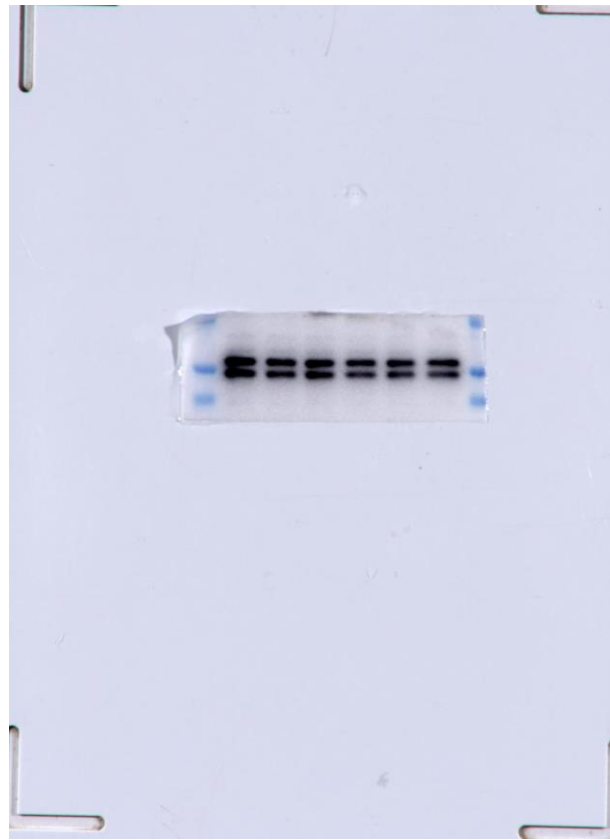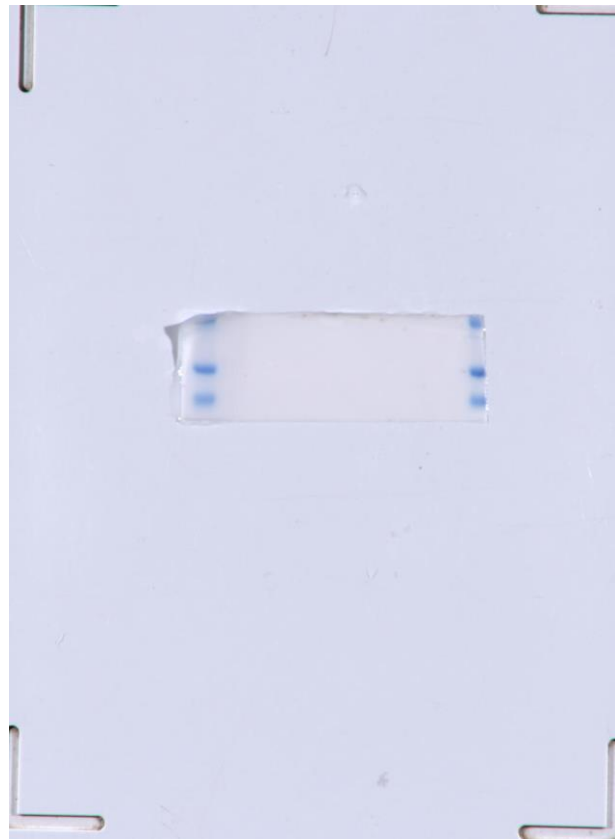

Figure 6 A-3

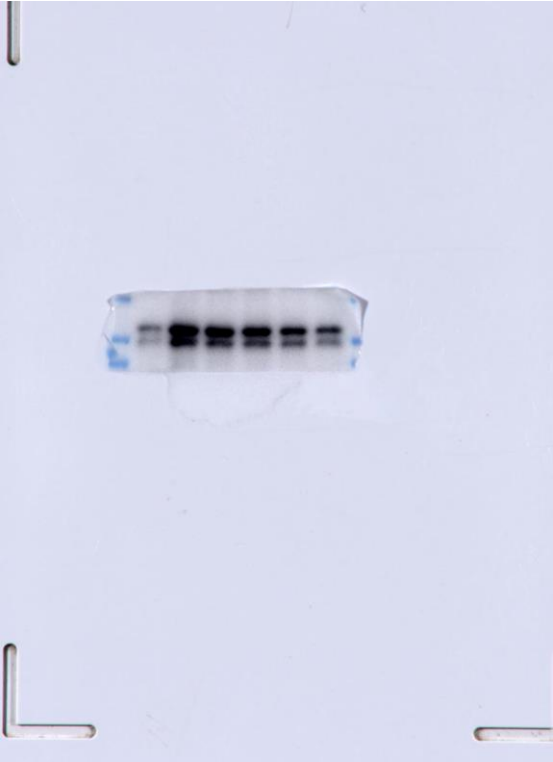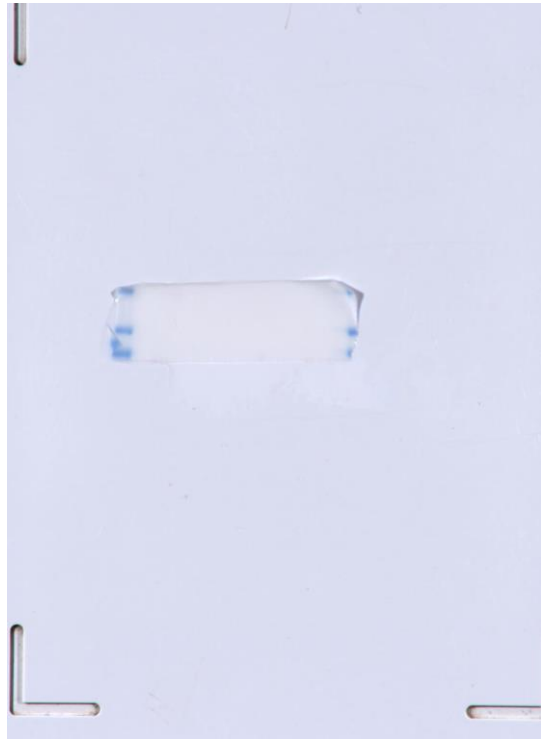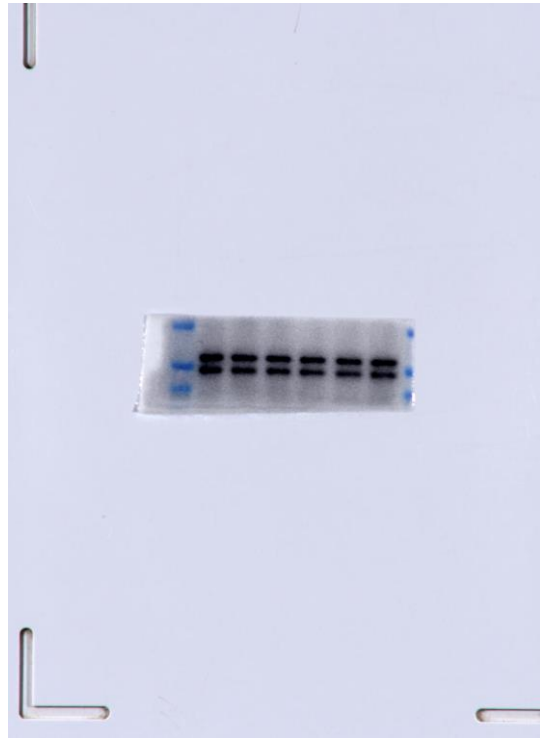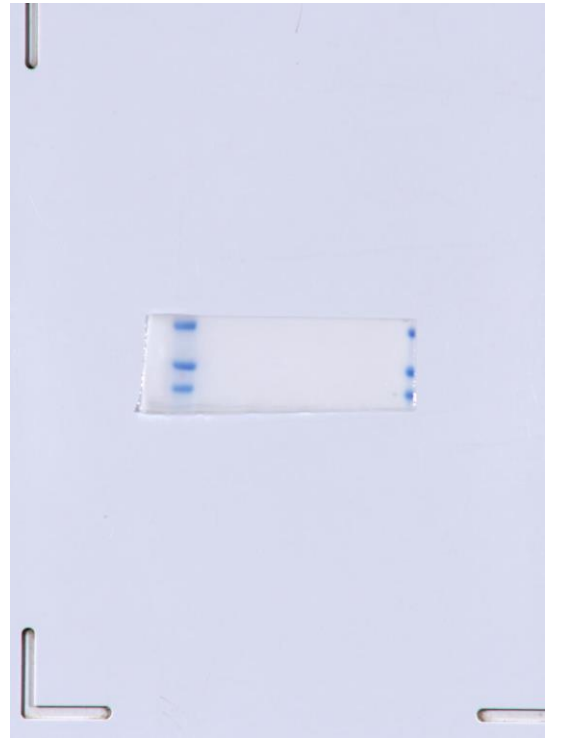

Figure 6 A-4

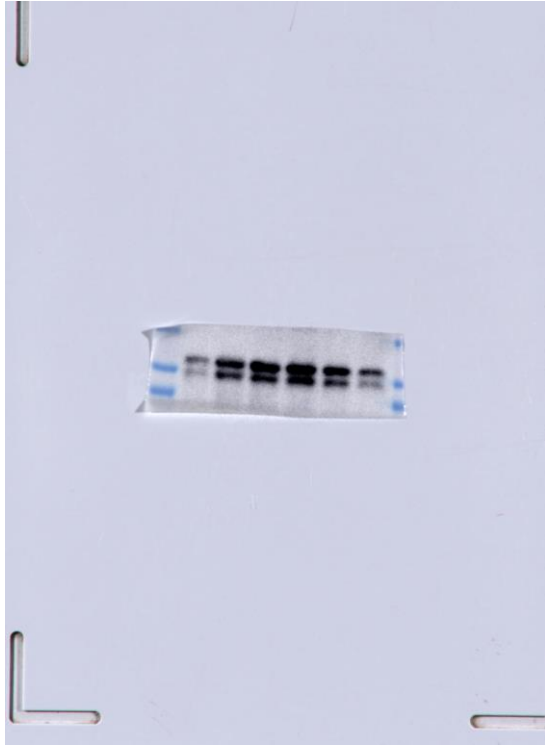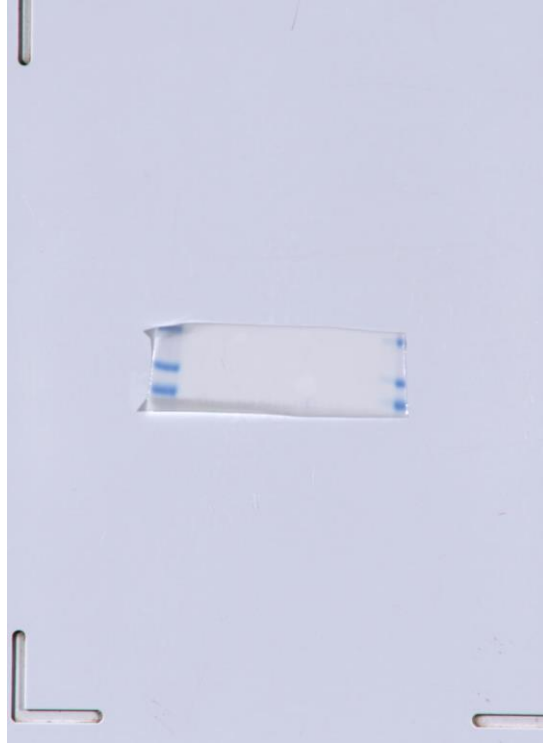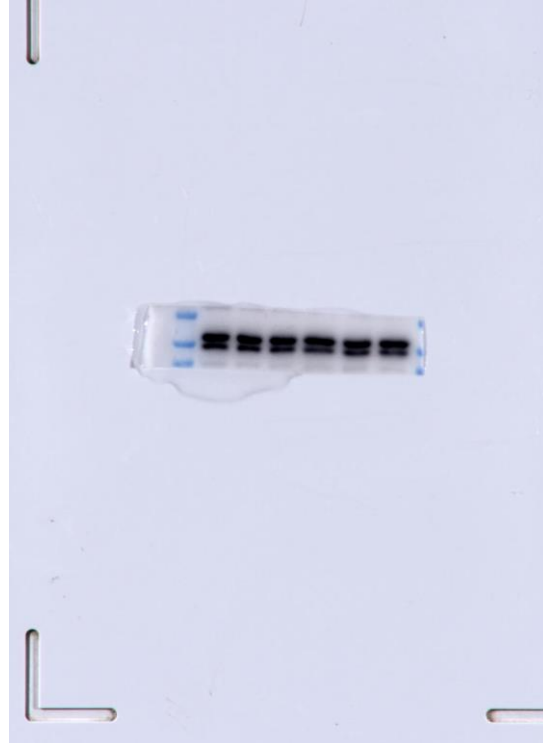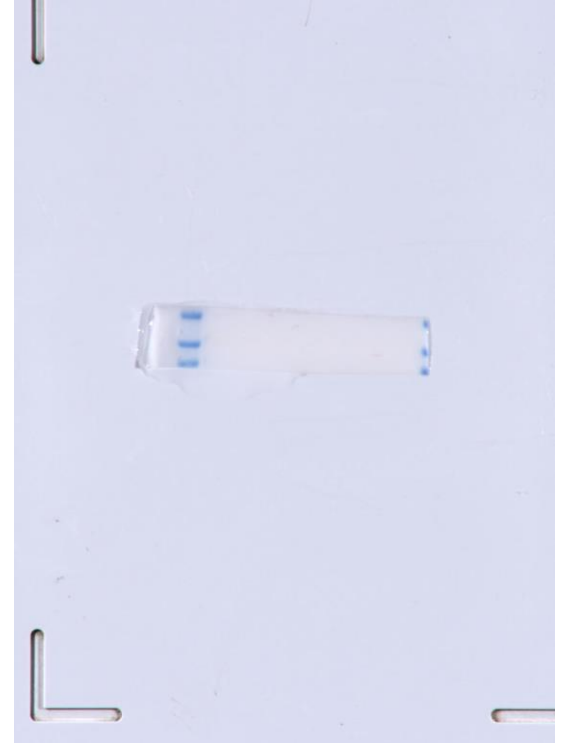

Figure 6 B-1

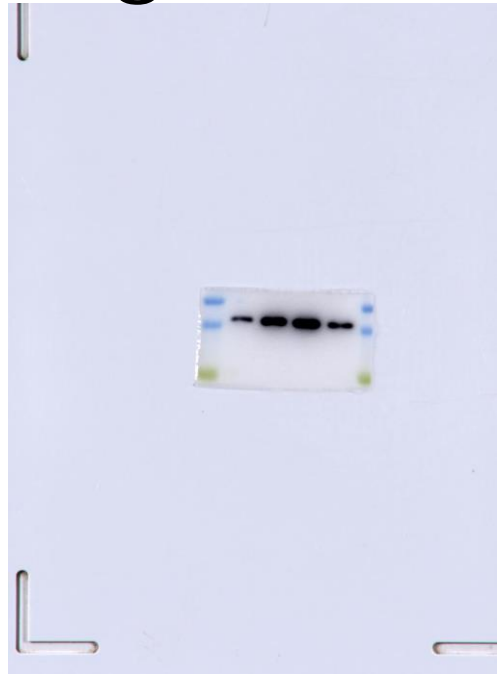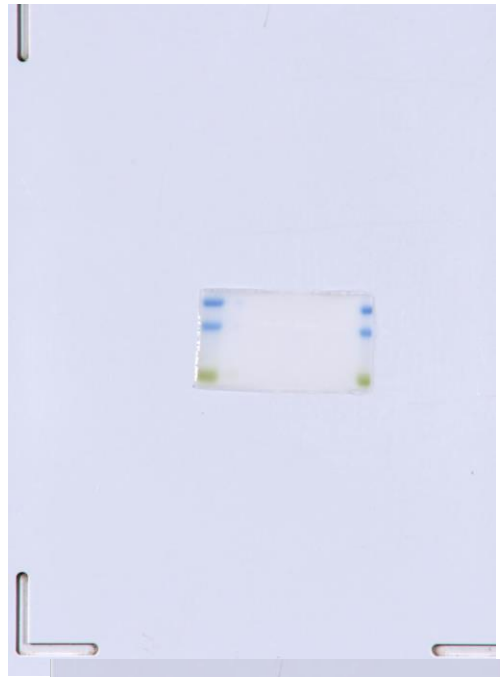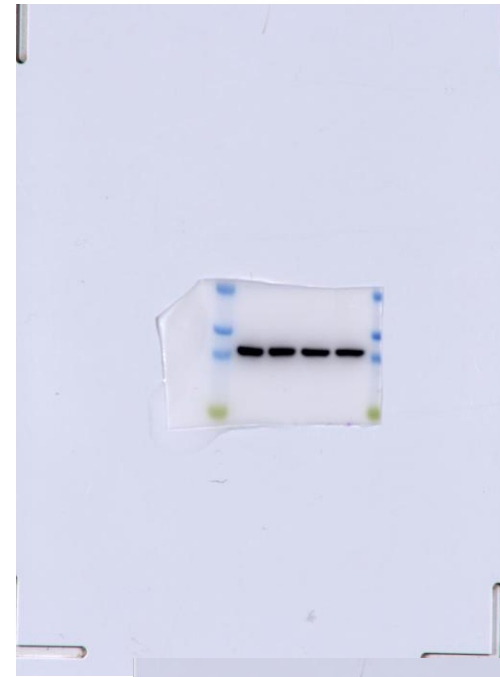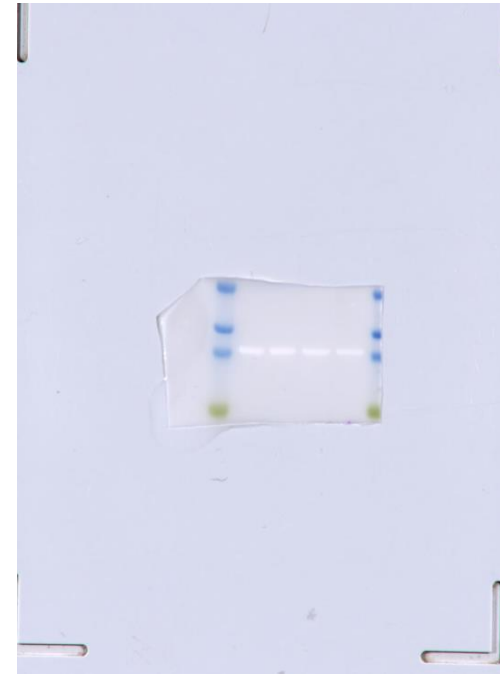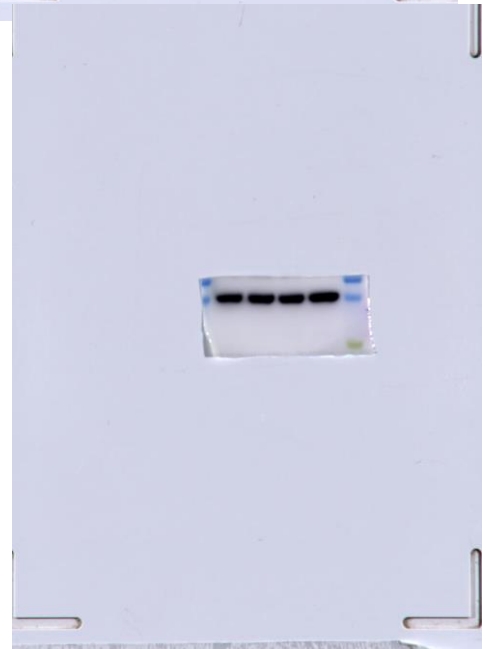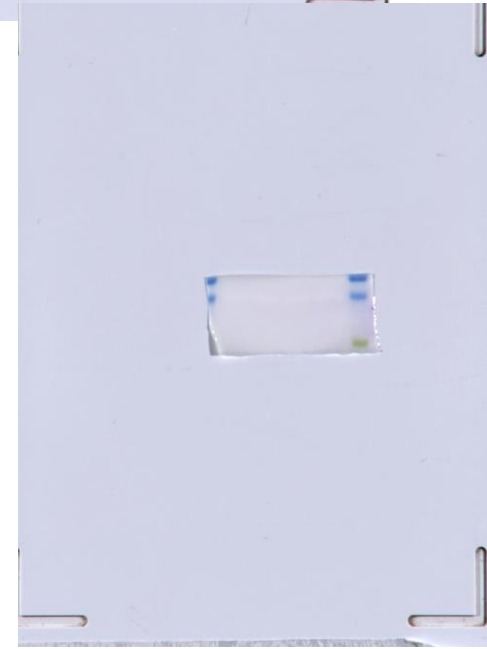

Figure 6 B-2

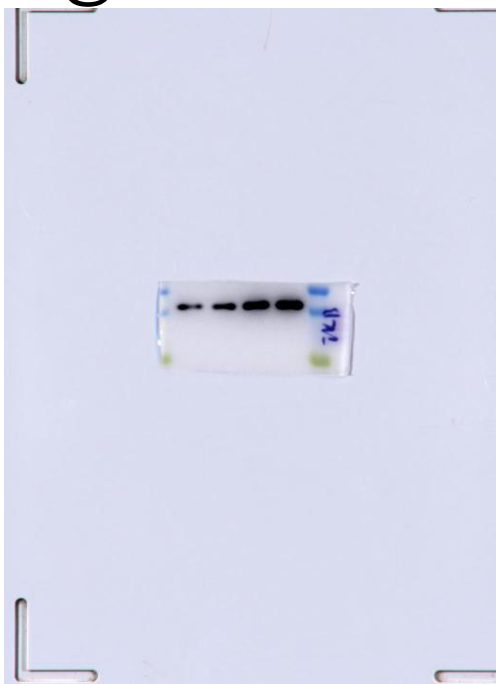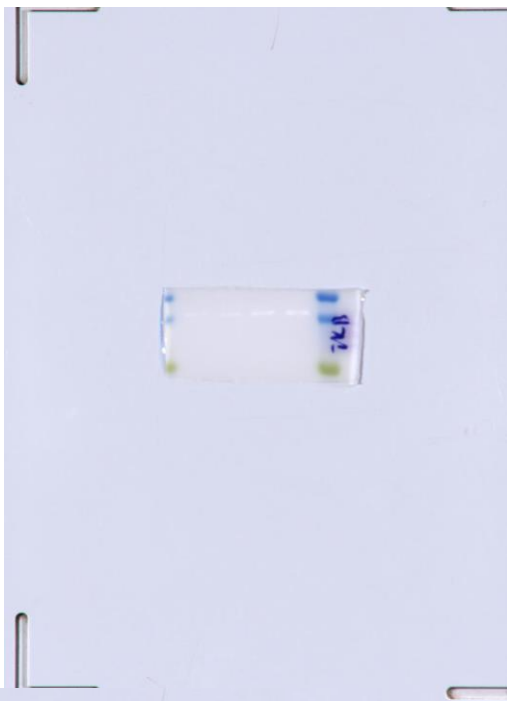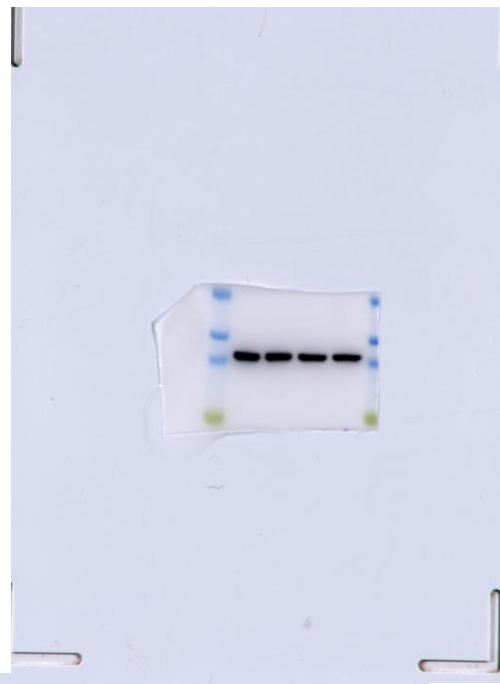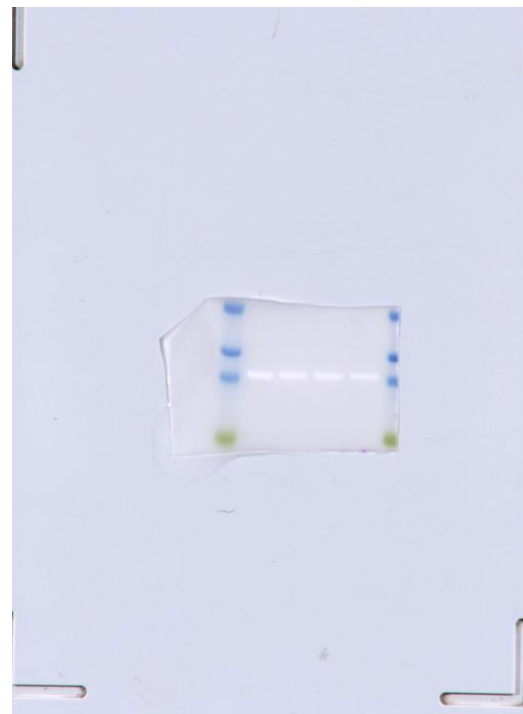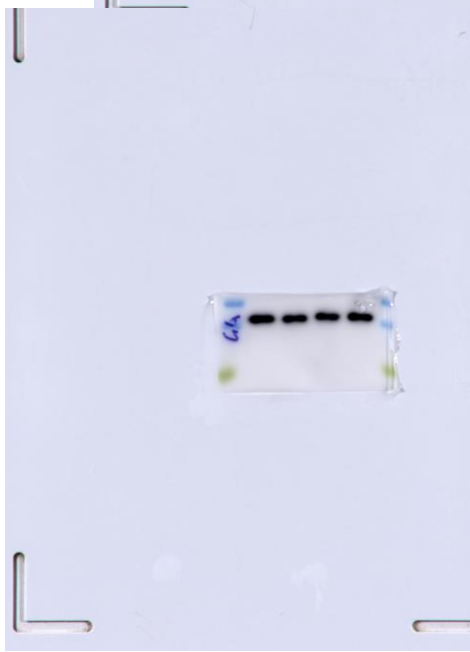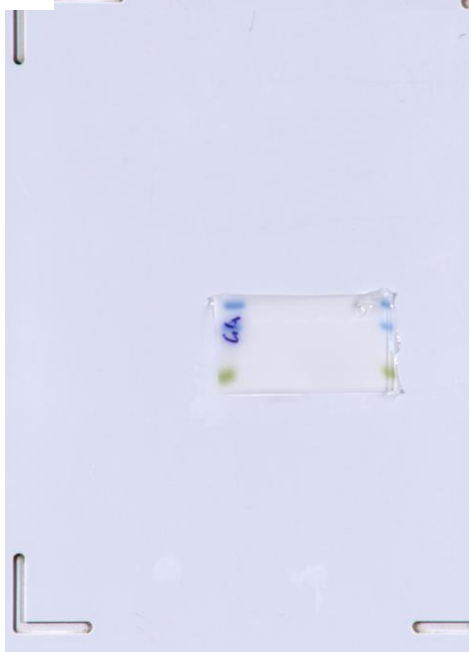

Figure S1 A

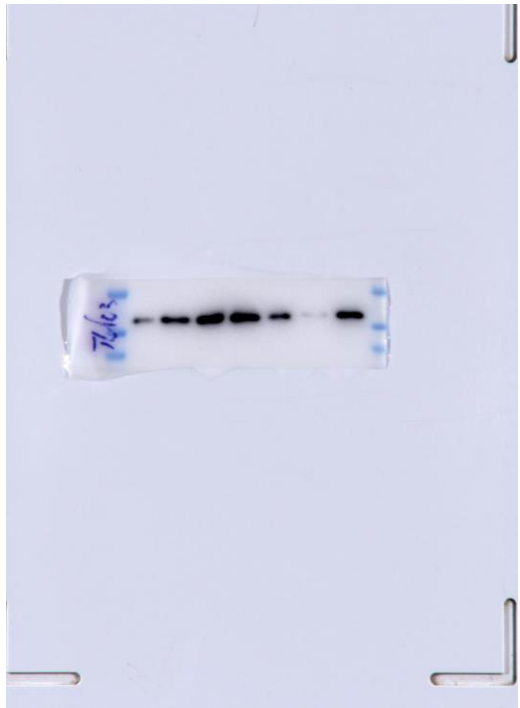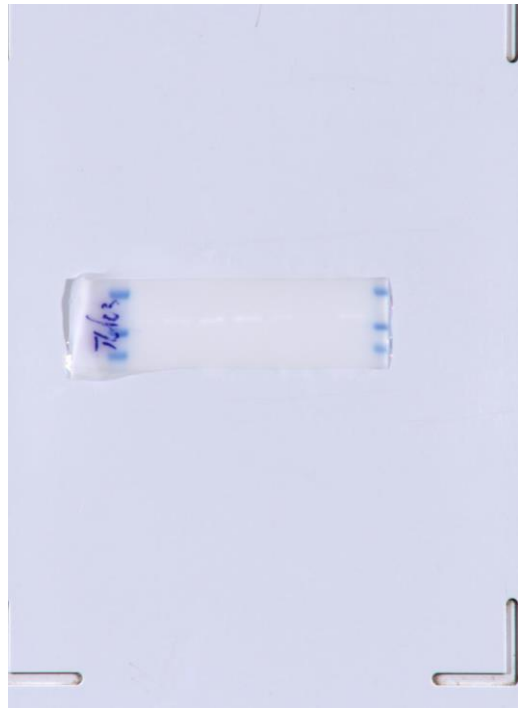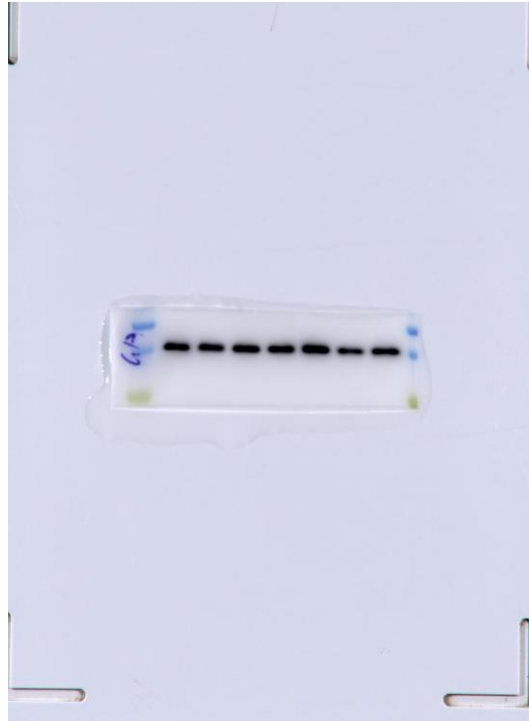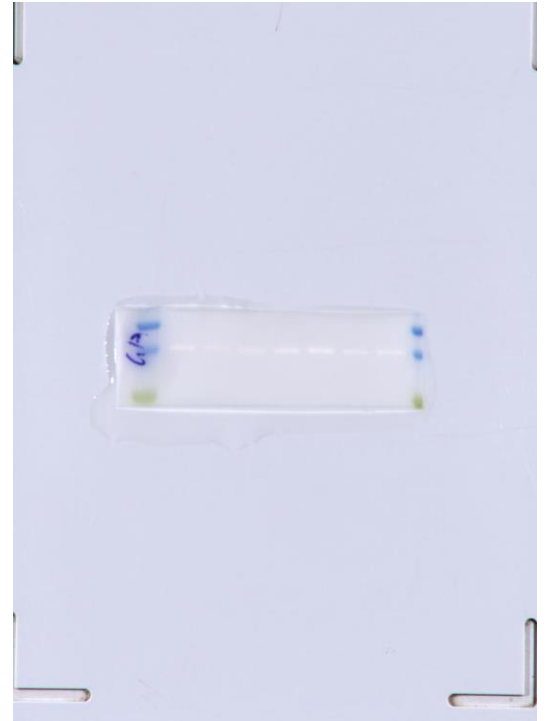



Figure S1 B LM3

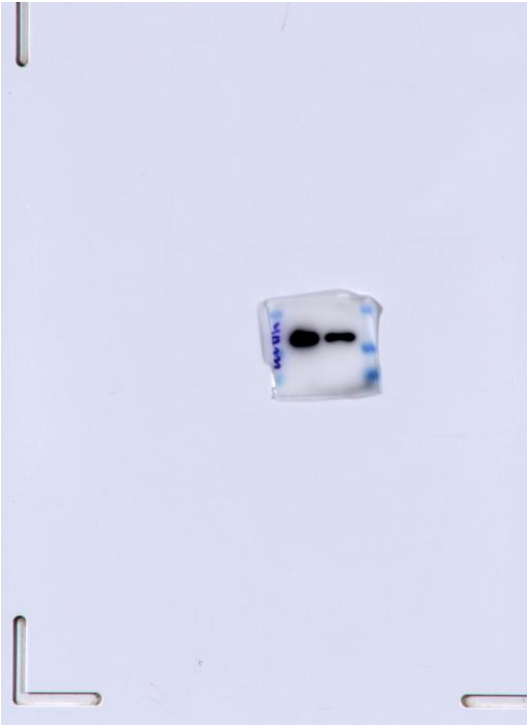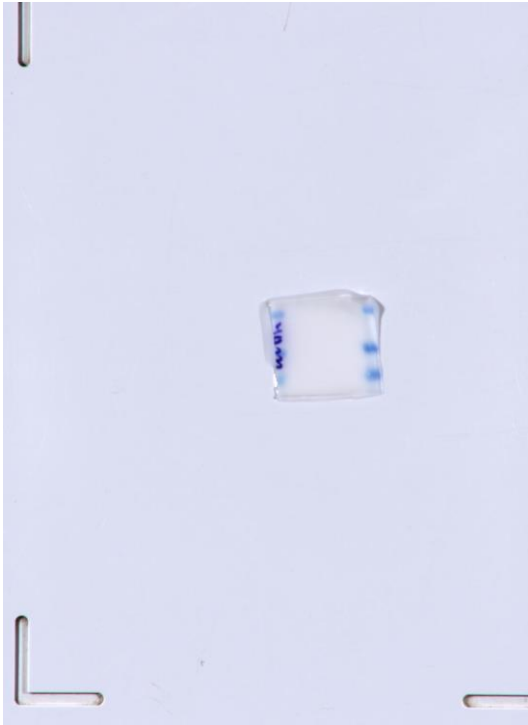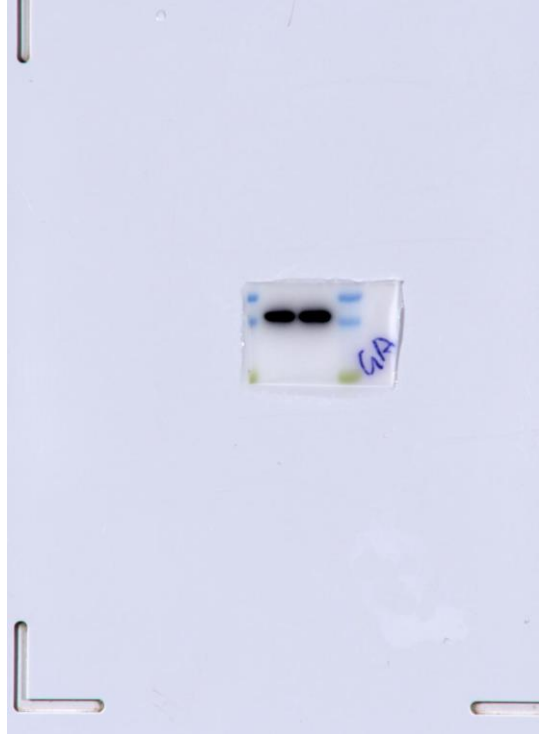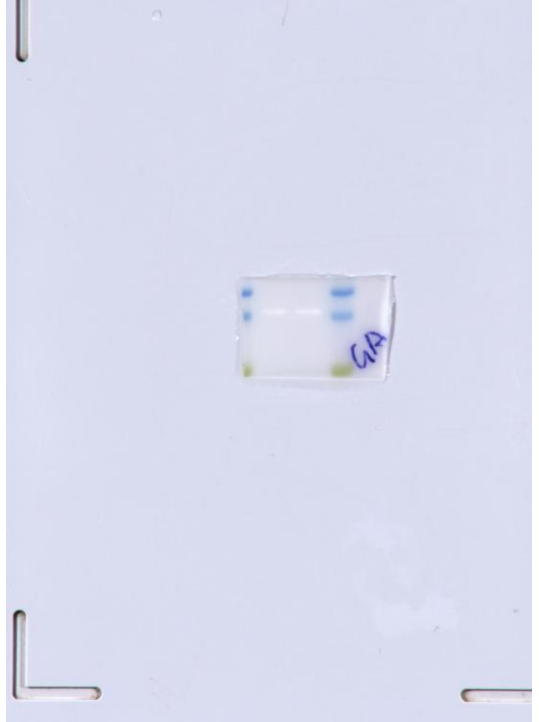

Figure S1 B HepG2

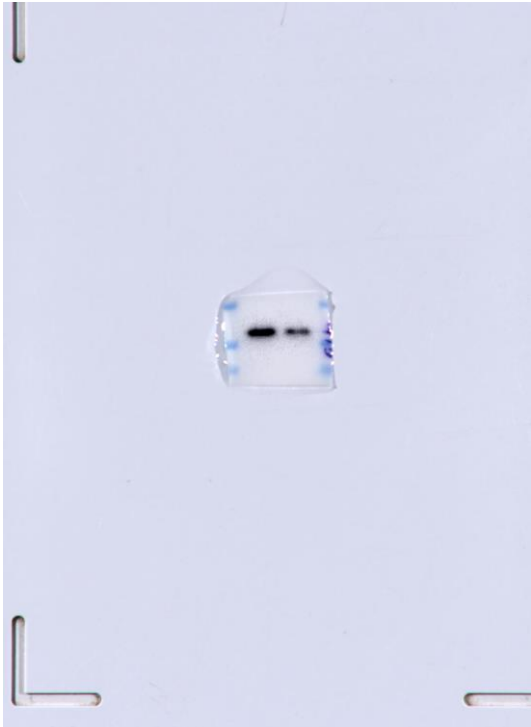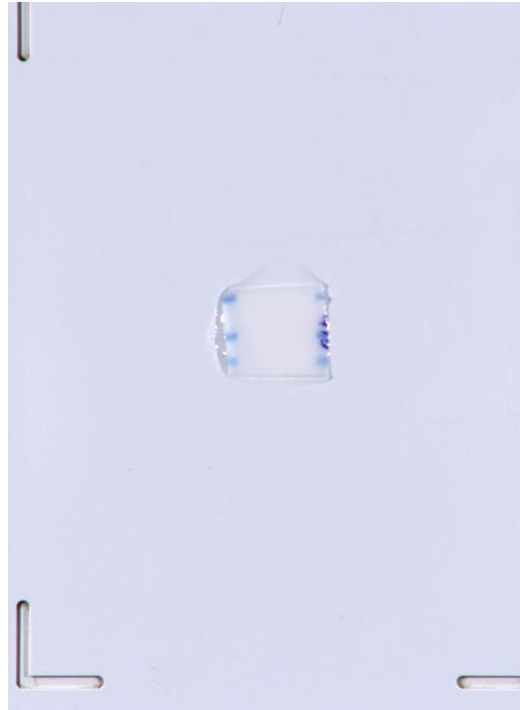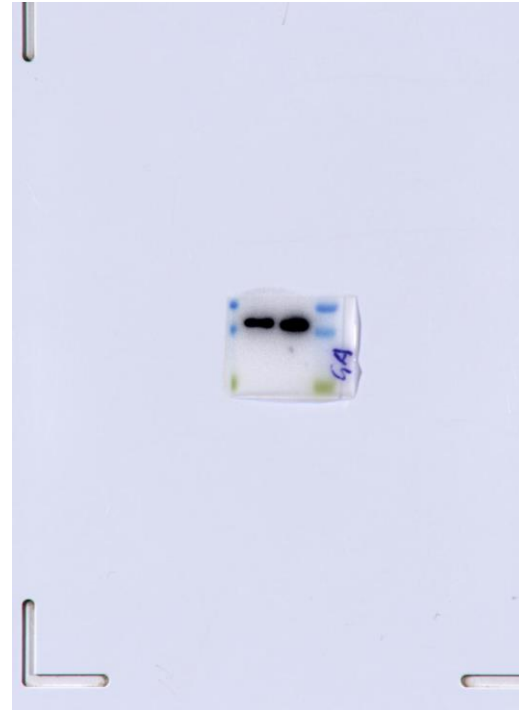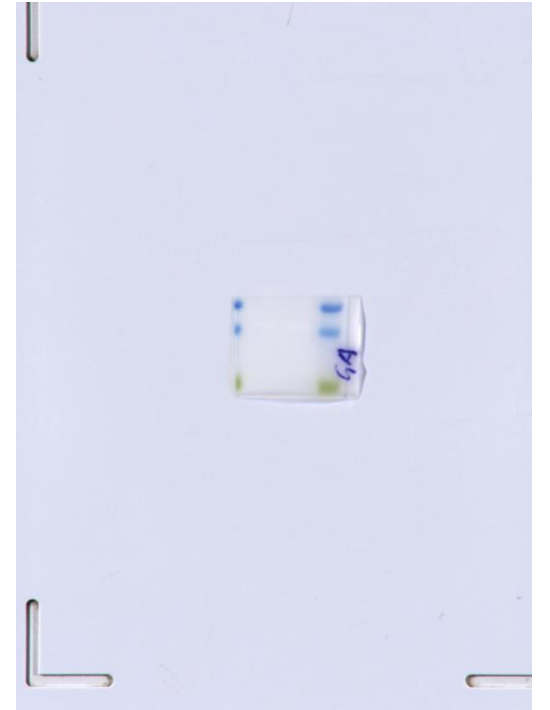

Figure S2 B

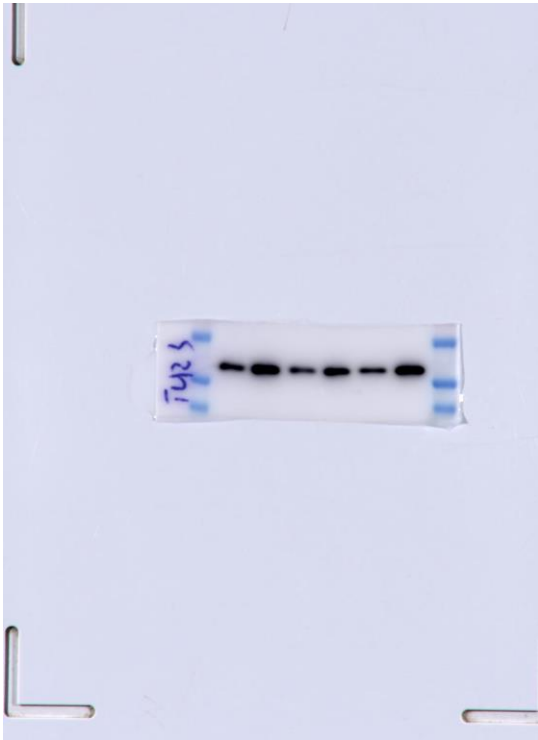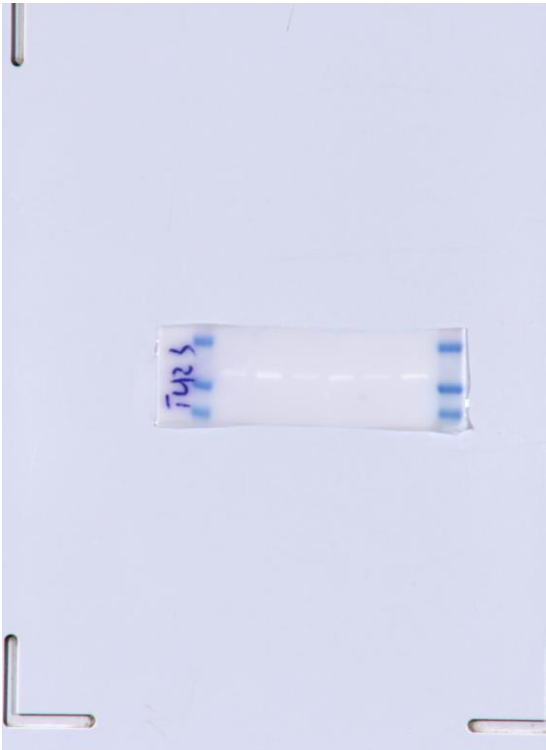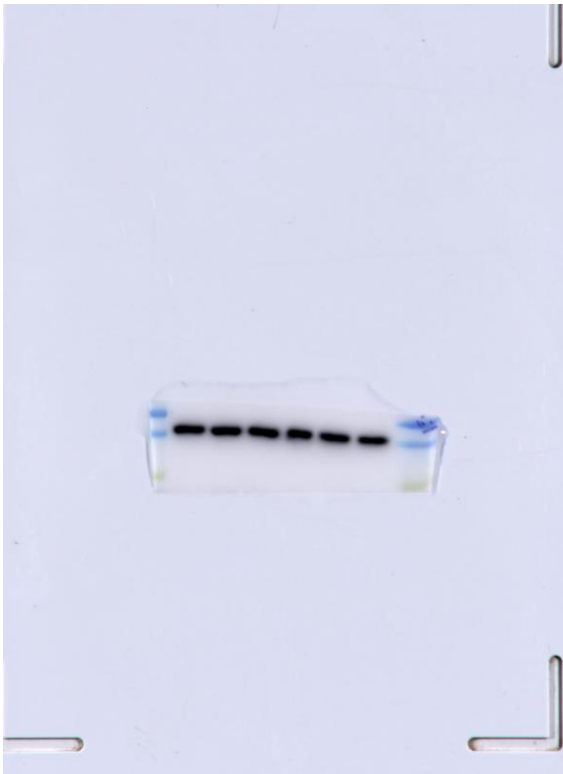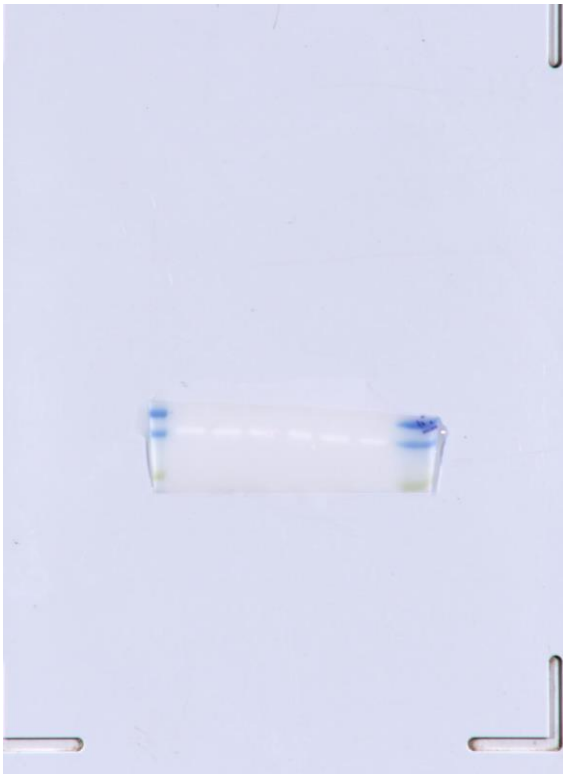

Supplement: 41598_2024_78316_MOESM1_ESM.pdf [file 41598_2024_78316_MOESM1_ESM.pdf]
