# Supplementary material for: TLR3 activation enhances antitumor effects of sorafenib in hepatocellular carcinoma by activating NK cell functions through ERK and NF-κB pathways
Source: PubMed Central journal article supplement — Sci Rep. 2024 Nov 2;14:26422. doi: 10.1038/s41598-024-78316-3 (PMC11531577; doi:10.1038/s41598-024-78316-3), 2024-11-02
Supplement: 41598_2024_78316_MOESM2_ESM.pdf [file 41598_2024_78316_MOESM2_ESM.pdf]

LM3 – shTLR3 control Tumor volume

|     |     |        |
|-----|-----|--------|
| 1.3 | 1.1 | 0.7865 |
| 1.7 | 1.5 | 1.9125 |
| 1.6 | 1.3 | 1.352  |
| 1.5 | 1.4 | 1.47   |
| 1.8 | 1.4 | 1.764  |
| 1.4 | 1.4 | 1.372  |

LM3 – shTLR3 sorafenib Tumor volume

|     |     |        |
|-----|-----|--------|
| 1.1 | 1.1 | 0.6655 |
| 1.2 | 1   | 0.6    |
| 0.9 | 0.7 | 0.2205 |
| 1.3 | 1.1 | 0.7865 |
| 1.2 | 1   | 0.6    |
| 1   | 0.8 | 0.32   |

LM3 – shTLR3 Poly(I:C) Tumor volume

|     |     |        |
|-----|-----|--------|
| 1.6 | 1.2 | 1.152  |
| 1.7 | 1.3 | 1.4365 |
| 1.5 | 1.4 | 1.47   |
| 1.4 | 1.3 | 1.183  |
| 1.4 | 1.1 | 0.847  |
| 1.3 | 0.9 | 0.5265 |

LM3 – shTLR3 Combination Tumor volume

|     |     |        |
|-----|-----|--------|
| 1   | 0.8 | 0.32   |
| 1.2 | 0.9 | 0.486  |
| 1.3 | 1.1 | 0.7865 |
| 1   | 0.8 | 0.32   |
| 1.2 | 0.9 | 0.486  |
| 0.8 | 0.6 | 0.144  |

LM3 – Mock control Tumor volume

|     |     |        |
|-----|-----|--------|
| 1.6 | 1.2 | 1.152  |
| 1.5 | 1.3 | 1.2675 |
| 1.4 | 1.4 | 1.372  |
| 1.1 | 1.1 | 0.6655 |
| 1   | 0.9 | 0.405  |

LM3 – Mock Poly(I:C) Tumor volume

|     |     |        |
|-----|-----|--------|
| 1   | 1   | 0.5    |
| 0.9 | 0.7 | 0.2205 |
| 1.1 | 1.1 | 0.6655 |
| 0.9 | 0.9 | 0.3645 |
| 0.8 | 1   | 0.4    |
| 0.7 | 0.7 | 0.1715 |

LM3 – Mock Combination Tumor volume

|     |     |        |
|-----|-----|--------|
| 1.1 | 0.8 | 0.352  |
| 0.9 | 0.7 | 0.2205 |
| 0.9 | 0.7 | 0.2205 |
| 0.8 | 0.6 | 0.144  |
| 0.7 | 0.5 | 0.0875 |
| 0.6 | 0.4 | 0.048  |

LM3 – shTLR3+hNK control Tumor volume

|     |     |        |
|-----|-----|--------|
| 1.4 | 1.4 | 1.372  |
| 1.5 | 1.3 | 1.2675 |
| 1.4 | 1.5 | 1.575  |
| 1.5 | 1.4 | 1.47   |
| 1.1 | 1.1 | 0.6655 |

LM3 – shTLR3+hNK Poly(I:C) Tumor volume

|     |     |        |
|-----|-----|--------|
| 1.3 | 1.1 | 0.7865 |
| 1.2 | 1.1 | 0.726  |
| 1.1 | 1   | 0.55   |
| 1.1 | 1   | 0.55   |
| 1   | 1   | 0.5    |

LM3 – shTLR3+hNK Sorafenib Tumor volume

|     |     |        |
|-----|-----|--------|
| 1   | 1   | 0.5    |
| 1.1 | 1.1 | 0.6655 |
| 1.2 | 0.9 | 0.486  |
| 1.1 | 0.9 | 0.4455 |
| 1   | 0.8 | 0.32   |
| 1   | 0.9 | 0.405  |

LM3 – shTLR3+hNK Combination Tumor volume

|     |     |        |
|-----|-----|--------|
| 0.7 | 0.5 | 0.0875 |
| 0.7 | 0.6 | 0.126  |
| 0.6 | 0.6 | 0.108  |
| 0.4 | 0.4 | 0.032  |
| 0.4 | 0.4 | 0.032  |
| 0.5 | 0.4 | 0.04   |
