# Supplementary material for: TLR3 activation enhances antitumor effects of sorafenib in hepatocellular carcinoma by activating NK cell functions through ERK and NF-κB pathways
Source: PubMed Central journal article supplement — Sci Rep. 2024 Nov 2;14:26422. doi: 10.1038/s41598-024-78316-3 (PMC11531577; doi:10.1038/s41598-024-78316-3), 2024-11-02
Supplement: 41598_2024_78316_MOESM3_ESM.pdf [file 41598_2024_78316_MOESM3_ESM.pdf]

| N1    | HCC1  | N2    | HCC2   | N3    | HCC3  |
|-------|-------|-------|--------|-------|-------|
| 1.430 | 2.185 | 1.2   | 2.5304 | 1.494 | 2.384 |
| 1.184 | 2.960 | 1.066 | 2.0928 | 0.763 | 3.28  |
| 0.845 | 2.828 | 1.257 | 1.7701 | 1.016 | 3.461 |

| N1            | N2     |        |        |        |              |        |        |        |        |              |
|---------------|--------|--------|--------|--------|--------------|--------|--------|--------|--------|--------------|
| <b>33.169</b> | 20.449 | 12.720 | 13.236 | -0.517 | <b>1.430</b> | 35.284 | 22.311 | 12.973 | -0.263 | <b>1.200</b> |
| 33.442        | 20.449 | 12.993 | 13.236 | -0.243 | <b>1.184</b> | 35.455 | 22.311 | 13.144 | -0.092 | <b>1.066</b> |
| 33.929        | 20.449 | 13.480 | 13.236 | 0.243  | <b>0.845</b> | 35.217 | 22.311 | 12.906 | -0.330 | <b>1.257</b> |

|        |        |  |  |  |  |        |        |  |  |  |
|--------|--------|--|--|--|--|--------|--------|--|--|--|
| 20.618 | 20.449 |  |  |  |  | 22.232 | 22.311 |  |  |  |
| 20.280 |        |  |  |  |  | 22.295 |        |  |  |  |
| 21.739 |        |  |  |  |  | 22.406 |        |  |  |  |
|        |        |  |  |  |  | 23.207 |        |  |  |  |

| HCC1   | HCC3   |        |        |              |        |        |        |        |              |  |
|--------|--------|--------|--------|--------------|--------|--------|--------|--------|--------------|--|
| 32.933 | 20.824 | 12.108 | -1.128 | <b>2.185</b> | 34.768 | 22.785 | 11.983 | -1.253 | <b>2.384</b> |  |
| 32.495 | 20.824 | 11.670 | -1.566 | <b>2.960</b> | 34.307 | 22.785 | 11.522 | -1.714 | <b>3.280</b> |  |
| 32.560 | 20.824 | 11.736 | -1.500 | <b>2.828</b> | 34.230 | 22.785 | 11.445 | -1.791 | <b>3.461</b> |  |

|        |        |  |  |  |  |        |        |  |  |  |
|--------|--------|--|--|--|--|--------|--------|--|--|--|
| 20.865 | 20.824 |  |  |  |  | 22.984 | 22.785 |  |  |  |
| 20.714 |        |  |  |  |  | 22.672 |        |  |  |  |
| 20.894 |        |  |  |  |  | 22.699 |        |  |  |  |
| 21.321 |        |  |  |  |  | 23.778 |        |  |  |  |

| HCC2   | N3     |        |        |              |        |        |        |        |              |  |
|--------|--------|--------|--------|--------------|--------|--------|--------|--------|--------------|--|
| 30.614 | 18.717 | 11.897 | -1.339 | <b>2.530</b> | 33.867 | 21.210 | 12.657 | -0.579 | <b>1.494</b> |  |
| 30.888 | 18.717 | 12.171 | -1.065 | <b>2.093</b> | 34.837 | 21.210 | 13.627 | 0.391  | <b>0.763</b> |  |
| 31.129 | 18.717 | 12.412 | -0.824 | <b>1.770</b> | 34.423 | 21.210 | 13.213 | 13.213 | <b>0.000</b> |  |

|        |        |  |  |  |  |        |        |  |  |  |
|--------|--------|--|--|--|--|--------|--------|--|--|--|
| 18.819 | 18.717 |  |  |  |  | 21.081 | 21.210 |  |  |  |
| 18.615 |        |  |  |  |  | 20.845 |        |  |  |  |
| 19.561 |        |  |  |  |  | 21.125 |        |  |  |  |
| 19.842 |        |  |  |  |  | 21.790 |        |  |  |  |

| Well | Well Posi | Omit  | Sample I | Target  | Task  | Report | Quench | CT      | Ct Mean | Ct SD |
|------|-----------|-------|----------|---------|-------|--------|--------|---------|---------|-------|
| 1    | A1        | FALSE | Sample   | :Target | UNKNC | SYBR   | None   | Undeter | 27.871  | 6.358 |
| 2    | A2        | FALSE | Sample   | :Target | UNKNC | SYBR   | None   | Undeter | 27.871  | 6.358 |
| 3    | A3        | FALSE | Sample   | :Target | UNKNC | SYBR   | None   | Undeter | 27.871  | 6.358 |
| 4    | A4        | FALSE | Sample   | :Target | UNKNC | SYBR   | None   | Undeter | 27.871  | 6.358 |
| 5    | A5        | FALSE | Sample   | :Target | UNKNC | SYBR   | None   | Undeter | 27.871  | 6.358 |

|        |       |        |        |       |      |      |         |        |       |
|--------|-------|--------|--------|-------|------|------|---------|--------|-------|
| 6 A6   | FALSE | Sample | Target | UNKNC | SYBR | None | 34.768  | 27.871 | 6.358 |
| 7 A7   | FALSE | Sample | Target | UNKNC | SYBR | None | 32.565  | 27.871 | 6.358 |
| 8 A8   | FALSE | Sample | Target | UNKNC | SYBR | None | 30.614  | 27.871 | 6.358 |
| 9 A9   | FALSE | Sample | Target | UNKNC | SYBR | None | 34.877  | 27.871 | 6.358 |
| 10 A10 | FALSE | Sample | Target | UNKNC | SYBR | None | 37.659  | 27.871 | 6.358 |
| 11 A11 | FALSE | Sample | Target | UNKNC | SYBR | None | Undeter | 27.871 | 6.358 |
| 12 A12 | FALSE | Sample | Target | UNKNC | SYBR | None | Undeter | 27.871 | 6.358 |
| 13 B1  | FALSE | Sample | Target | UNKNC | SYBR | None | 33.169  | 27.871 | 6.358 |
| 14 B2  | FALSE | Sample | Target | UNKNC | SYBR | None | 35.905  | 27.871 | 6.358 |
| 15 B3  | FALSE | Sample | Target | UNKNC | SYBR | None | 35.284  | 27.871 | 6.358 |
| 16 B4  | FALSE | Sample | Target | UNKNC | SYBR | None | 34.443  | 27.871 | 6.358 |
| 17 B5  | FALSE | Sample | Target | UNKNC | SYBR | None | 32.933  | 27.871 | 6.358 |
| 18 B6  | FALSE | Sample | Target | UNKNC | SYBR | None | 34.307  | 27.871 | 6.358 |
| 19 B7  | FALSE | Sample | Target | UNKNC | SYBR | None | 32.968  | 27.871 | 6.358 |
| 20 B8  | FALSE | Sample | Target | UNKNC | SYBR | None | 30.888  | 27.871 | 6.358 |
| 21 B9  | FALSE | Sample | Target | UNKNC | SYBR | None | 33.867  | 27.871 | 6.358 |
| 22 B10 | FALSE | Sample | Target | UNKNC | SYBR | None | 36.992  | 27.871 | 6.358 |
| 23 B11 | FALSE | Sample | Target | UNKNC | SYBR | None | 34.886  | 27.871 | 6.358 |
| 24 B12 | FALSE | Sample | Target | UNKNC | SYBR | None | Undeter | 27.871 | 6.358 |
| 25 C1  | FALSE | Sample | Target | UNKNC | SYBR | None | Undeter | 27.871 | 6.358 |
| 26 C2  | FALSE | Sample | Target | UNKNC | SYBR | None | 33.442  | 27.871 | 6.358 |
| 27 C3  | FALSE | Sample | Target | UNKNC | SYBR | None | 35.455  | 27.871 | 6.358 |
| 28 C4  | FALSE | Sample | Target | UNKNC | SYBR | None | 34.689  | 27.871 | 6.358 |
| 29 C5  | FALSE | Sample | Target | UNKNC | SYBR | None | 32.495  | 27.871 | 6.358 |
| 30 C6  | FALSE | Sample | Target | UNKNC | SYBR | None | 34.230  | 27.871 | 6.358 |
| 31 C7  | FALSE | Sample | Target | UNKNC | SYBR | None | 32.958  | 27.871 | 6.358 |
| 32 C8  | FALSE | Sample | Target | UNKNC | SYBR | None | 31.129  | 27.871 | 6.358 |
| 33 C9  | FALSE | Sample | Target | UNKNC | SYBR | None | 34.837  | 27.871 | 6.358 |
| 34 C10 | FALSE | Sample | Target | UNKNC | SYBR | None | 39.211  | 27.871 | 6.358 |
| 35 C11 | FALSE | Sample | Target | UNKNC | SYBR | None | 35.312  | 27.871 | 6.358 |
| 36 C12 | FALSE | Sample | Target | UNKNC | SYBR | None | Undeter | 27.871 | 6.358 |
| 37 D1  | FALSE | Sample | Target | UNKNC | SYBR | None | Undeter | 27.871 | 6.358 |
| 38 D2  | FALSE | Sample | Target | UNKNC | SYBR | None | 33.929  | 27.871 | 6.358 |
| 39 D3  | FALSE | Sample | Target | UNKNC | SYBR | None | 35.217  | 27.871 | 6.358 |
| 40 D4  | FALSE | Sample | Target | UNKNC | SYBR | None | 35.255  | 27.871 | 6.358 |
| 41 D5  | FALSE | Sample | Target | UNKNC | SYBR | None | 32.560  | 27.871 | 6.358 |
| 42 D6  | FALSE | Sample | Target | UNKNC | SYBR | None | 35.495  | 27.871 | 6.358 |
| 43 D7  | FALSE | Sample | Target | UNKNC | SYBR | None |         | 27.871 | 6.358 |
| 44 D8  | FALSE | Sample | Target | UNKNC | SYBR | None | 31.384  | 27.871 | 6.358 |
| 45 D9  | FALSE | Sample | Target | UNKNC | SYBR | None | 34.423  | 27.871 | 6.358 |
| 46 D10 | FALSE | Sample | Target | UNKNC | SYBR | None |         | 27.871 | 6.358 |
| 47 D11 | FALSE | Sample | Target | UNKNC | SYBR | None | 35.772  | 27.871 | 6.358 |
| 48 D12 | FALSE | Sample | Target | UNKNC | SYBR | None | 39.596  | 27.871 | 6.358 |
| 49 E1  | FALSE | Sample | Target | UNKNC | SYBR | None | 31.907  | 27.871 | 6.358 |
| 50 E2  | FALSE | Sample | Target | UNKNC | SYBR | None | 20.618  | 27.871 | 6.358 |
| 51 E3  | FALSE | Sample | Target | UNKNC | SYBR | None | 22.232  | 27.871 | 6.358 |
| 52 E4  | FALSE | Sample | Target | UNKNC | SYBR | None | 22.315  | 27.871 | 6.358 |
| 53 E5  | FALSE | Sample | Target | UNKNC | SYBR | None | 20.865  | 27.871 | 6.358 |
| 54 E6  | FALSE | Sample | Target | UNKNC | SYBR | None | 22.984  | 27.871 | 6.358 |
| 55 E7  | FALSE | Sample | Target | UNKNC | SYBR | None | 20.391  | 27.871 | 6.358 |
| 56 E8  | FALSE | Sample | Target | UNKNC | SYBR | None | 18.819  | 27.871 | 6.358 |
| 57 E9  | FALSE | Sample | Target | UNKNC | SYBR | None | 21.081  | 27.871 | 6.358 |
| 58 E10 | FALSE | Sample | Target | UNKNC | SYBR | None | 25.366  | 27.871 | 6.358 |
| 59 E11 | FALSE | Sample | Target | UNKNC | SYBR | None | 22.450  | 27.871 | 6.358 |
| 60 E12 | FALSE | Sample | Target | UNKNC | SYBR | None | 24.624  | 27.871 | 6.358 |
| 61 F1  | FALSE | Sample | Target | UNKNC | SYBR | None | 35.196  | 27.871 | 6.358 |
| 62 F2  | FALSE | Sample | Target | UNKNC | SYBR | None | 20.280  | 27.871 | 6.358 |
| 63 F3  | FALSE | Sample | Target | UNKNC | SYBR | None | 22.295  | 27.871 | 6.358 |

|    |     |       |        |        |       |      |      |          |        |       |
|----|-----|-------|--------|--------|-------|------|------|----------|--------|-------|
| 64 | F4  | FALSE | Sample | Target | UNKNC | SYBR | None | 22.092   | 27.871 | 6.358 |
| 65 | F5  | FALSE | Sample | Target | UNKNC | SYBR | None | 20.714   | 27.871 | 6.358 |
| 66 | F6  | FALSE | Sample | Target | UNKNC | SYBR | None | 22.672   | 27.871 | 6.358 |
| 67 | F7  | FALSE | Sample | Target | UNKNC | SYBR | None | 20.373   | 27.871 | 6.358 |
| 68 | F8  | FALSE | Sample | Target | UNKNC | SYBR | None | 18.615   | 27.871 | 6.358 |
| 69 | F9  | FALSE | Sample | Target | UNKNC | SYBR | None | 20.845   | 27.871 | 6.358 |
| 70 | F10 | FALSE | Sample | Target | UNKNC | SYBR | None | 25.109   | 27.871 | 6.358 |
| 71 | F11 | FALSE | Sample | Target | UNKNC | SYBR | None | 22.406   | 27.871 | 6.358 |
| 72 | F12 | FALSE | Sample | Target | UNKNC | SYBR | None | 24.505   | 27.871 | 6.358 |
| 73 | G1  | FALSE | Sample | Target | UNKNC | SYBR | None | Undeterr | 27.871 | 6.358 |
| 74 | G2  | FALSE | Sample | Target | UNKNC | SYBR | None | 21.739   | 27.871 | 6.358 |
| 75 | G3  | FALSE | Sample | Target | UNKNC | SYBR | None | 22.406   | 27.871 | 6.358 |
| 76 | G4  | FALSE | Sample | Target | UNKNC | SYBR | None | 22.189   | 27.871 | 6.358 |
| 77 | G5  | FALSE | Sample | Target | UNKNC | SYBR | None | 20.894   | 27.871 | 6.358 |
| 78 | G6  | FALSE | Sample | Target | UNKNC | SYBR | None | 22.699   | 27.871 | 6.358 |
| 79 | G7  | FALSE | Sample | Target | UNKNC | SYBR | None | 20.872   | 27.871 | 6.358 |
| 80 | G8  | FALSE | Sample | Target | UNKNC | SYBR | None | 19.561   | 27.871 | 6.358 |
| 81 | G9  | FALSE | Sample | Target | UNKNC | SYBR | None | 21.125   | 27.871 | 6.358 |
| 82 | G10 | FALSE | Sample | Target | UNKNC | SYBR | None | 25.259   | 27.871 | 6.358 |
| 83 | G11 | FALSE | Sample | Target | UNKNC | SYBR | None | 22.515   | 27.871 | 6.358 |
| 84 | G12 | FALSE | Sample | Target | UNKNC | SYBR | None | 25.340   | 27.871 | 6.358 |
| 85 | H1  | FALSE | Sample | Target | UNKNC | SYBR | None | 35.054   | 27.871 | 6.358 |
| 86 | H2  | FALSE | Sample | Target | UNKNC | SYBR | None | 22.282   | 27.871 | 6.358 |
| 87 | H3  | FALSE | Sample | Target | UNKNC | SYBR | None | 23.207   | 27.871 | 6.358 |
| 88 | H4  | FALSE | Sample | Target | UNKNC | SYBR | None | 22.624   | 27.871 | 6.358 |
| 89 | H5  | FALSE | Sample | Target | UNKNC | SYBR | None | 21.321   | 27.871 | 6.358 |
| 90 | H6  | FALSE | Sample | Target | UNKNC | SYBR | None | 23.778   | 27.871 | 6.358 |
| 91 | H7  | FALSE | Sample | Target | UNKNC | SYBR | None | 22.546   | 27.871 | 6.358 |
| 92 | H8  | FALSE | Sample | Target | UNKNC | SYBR | None | 19.842   | 27.871 | 6.358 |
| 93 | H9  | FALSE | Sample | Target | UNKNC | SYBR | None | 21.790   | 27.871 | 6.358 |
| 94 | H10 | FALSE | Sample | Target | UNKNC | SYBR | None | 27.535   | 27.871 | 6.358 |
| 95 | H11 | FALSE | Sample | Target | UNKNC | SYBR | None | 23.599   | 27.871 | 6.358 |
| 96 | H12 | FALSE | Sample | Target | UNKNC | SYBR | None | 26.000   | 27.871 | 6.358 |
